# Supplementary material for: Functional characterization of calmodulin-like proteins, CML13 and CML14, as novel light chains of Arabidopsis class VIII myosins
Source: PubMed Central journal article supplement — J Exp Bot. 2024 Jan 27;75(8):2313–29. doi: 10.1093/jxb/erae031 (PMC11272076; doi:10.1093/jxb/erae031), 2024-01-27
Supplement: erae031_suppl_supplementary_tables_s1-s2_figures_s1-s7.pdf [file erae031_suppl_supplementary_tables_s1-s2_figures_s1-s7.pdf]

| Primer name         | Sequence (5'-3')                      | Restriction Enzyme |
|---------------------|---------------------------------------|--------------------|
| ATM1 F              | GGCCCATATGCGTACTCTCCACGGC             | NdeI               |
| ATM1 IQ1 R          | GGCCGGTCGACAATAGAAATCCCTTTAAGTTC      | Sall               |
| ATM1 IQ2 F          | GGCCGGATCCATGTCTCTCTGAAGGAACTAAAAG    | BamHI              |
| ATM1 IQ2 R          | GGCCGGTCGACTTAAGTAGCAGCAGCCTTATGCC    | Sall               |
| ATM1 IQ3 F          | GGCCCATATGAAAGAGTTTGCTGAGTTACG        | NdeI               |
| ATM1 IQ3 R          | GGCCGGTCGACTTACACAACGATGCATCG         | Sall               |
| ATM1 IQ4 F          | GGCCGGATCCATGATACAGTATAAGGGCATAG      | BamHI              |
| ATM1 R              | GGCCGGATCCTTAATCCCCTGAACATCTTC        | BamHI              |
| ATM2 F              | GGCCCATATGAGGAAAAAGTTCTTCAAGG         | NdeI               |
| ATM2 IQ1 R          | GGCCGGTCGACAACCAATGTTACTTTCCGC        | Sall               |
| ATM2 IQ2 F          | GGCCGGATCCATGGCATACTTCCAAAATATGCCG    | BamHI              |
| ATM2 IQ2 F          | GGCCCATATGGCATACTTCCAAAATATGCCG       | NdeI               |
| ATM2 IQ2 R          | GGCCGGTCGACGTGTACTGCACTCAACTC         | Sall               |
| ATM2 IQ3 F          | GGCCGGATCCATGAGATTGTTTGACACTGAAGC     | BamHI              |
| ATM2 IQ3 F          | GGCCCATATGAGATTGTTTGACACTGAAGC        | NdeI               |
| ATM2 R              | GGCCGGTCGACTTATTTTGTCTTTGCATACTATTG   | Sall               |
| VIII-A IQs F        | GGCCGGATCCATGAGGAATCGCACTGCATGGC      | BamHI              |
| VIII-A IQs R        | GGCCGGTCGACTTAACCTAAGCCATCCAAATATCCCC | Sall               |
| VIII-B IQs F        | GGCCGGATCCATGCGTGGCATACTTGATTACAG     | BamHI              |
| VIII-B IQs R        | GGCCGGTCGACTTAACCTAAGAGTTTACGAG       | Sall               |
| LbB1.3              | ATTTTGCCGATTTCCGAAC                   | N/A                |
| ATM1-4IQ F bacvirus | AAACCATGGCTCAGAAGGTTACTCC             | NcoI               |
| ATM1-4IQ R bacvirus | TTTACCAGTTCCAATATCCCCTGAACATC         | AgeI               |
| ATM2-3IQ F bacvirus | AAACCATGGCATTATCGGCATCGCCG            | NcoI               |
| ATM2-3IQ R bacvirus | TTTACCAGTTTGTCTTTCGATACTATTGAAATG     | AgeI               |
| ATM1 gF             | GGAAACGTTTCCTTCACCG                   | Genotyping         |
| ATM1 gR             | AATTTATACAGAAGTGCAGG                  | Genotyping         |
| ATM2 gF             | CCCCGAGTCCAGTAGACATCG                 | Genotyping         |
| ATM2 gR             | TCCGTGGTCACTTGTCTCGTG                 | Genotyping         |
| VIII-A gF           | cttgactatgagctagatcg                  | Genotyping         |
| VIII-A gR           | GTTACCGTTTGGAAAGTTGGAC                | Genotyping         |
| VIII-B gF           | TGCACAGCTGAGCCACTCTTG                 | Genotyping         |
| VIII-B gR           | TGCAGTGGCAGATGCAGCTTA                 | Genotyping         |

| Construct Name                                  | AGI                        | Amino Acids | Vectors          |
|-------------------------------------------------|----------------------------|-------------|------------------|
| ATM1 IQ1                                        | At3G19960                  | 848-878     | Nluc             |
| ATM1 IQ1+2                                      | At3G19960                  | 848-904     | Nluc, pGEX-4-T3  |
| ATM1 IQ2                                        | At3G19960                  | 867-904     | Nluc             |
| ATM1 IQ3                                        | At3G19960                  | 890-927     | Nluc             |
| ATM1 IQ3+4                                      | At3G19960                  | 890-943     | Nluc, pGEX-4-T3  |
| ATM1 IQ4                                        | At3G19960                  | 916-943     | Nluc             |
| ATM1 Neck                                       | At3G19960                  | 848-943     | Nluc, pET28b-GB1 |
| ATM2 IQ1                                        | At5G54280                  | 878-910     | Nluc             |
| ATM2 IQ1+2                                      | At5G54280                  | 878-948     | Nluc, pGEX-4-T3  |
| ATM2 IQ2                                        | At5G54280                  | 899-948     | Nluc             |
| ATM2 IQ3                                        | At5G54280                  | 922-967     | Nluc, pGEX-4-T3  |
| ATM2 Neck                                       | At5G54280                  | 878-967     | Nluc, pET28b     |
| CaM81                                           | M80836 (Genbank Accession) | Full        | Cluc, pET5a      |
| CML13                                           | At1G12310                  | Full        | Cluc, pET30a     |
| CML14                                           | At1G62820                  | Full        | Cluc, pET30a     |
| CML15                                           | At1G18530                  | Full        | Cluc             |
| CML19                                           | At4G37010                  | Full        | Cluc             |
| CML24                                           | At5G37770                  | Full        | Cluc             |
| CML35                                           | At2G41410                  | Full        | Cluc             |
| CML38                                           | At1G76650                  | Full        | Cluc             |
| CML42                                           | At4G20780                  | Full        | Cluc, pET5a      |
| CML6                                            | At4G03290                  | Full        | Cluc             |
| CML8                                            | At4G14640                  | Full        | Cluc             |
| VIII-A Neck                                     | At1G50360                  | 828-930     | Nluc             |
| VIII-B Neck                                     | At4G27370                  | 834-913     | Nluc             |
| See Methods for the vectors used for microscopy |                            |             |                  |

**A**

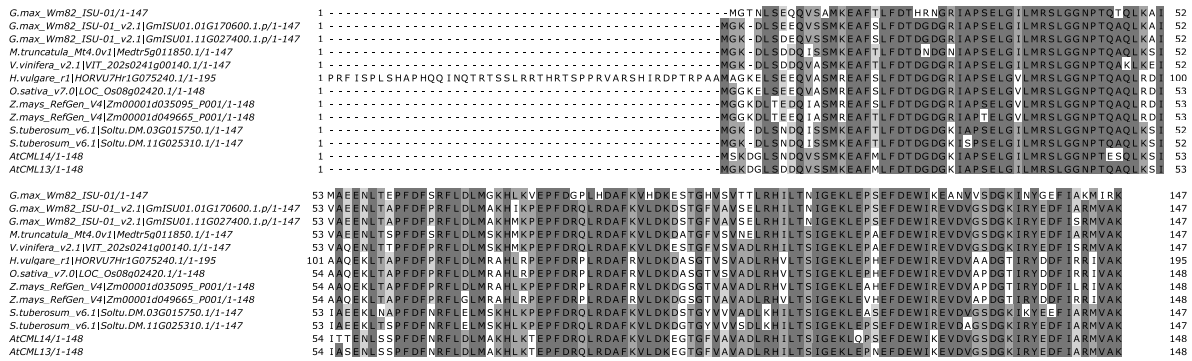

**B**

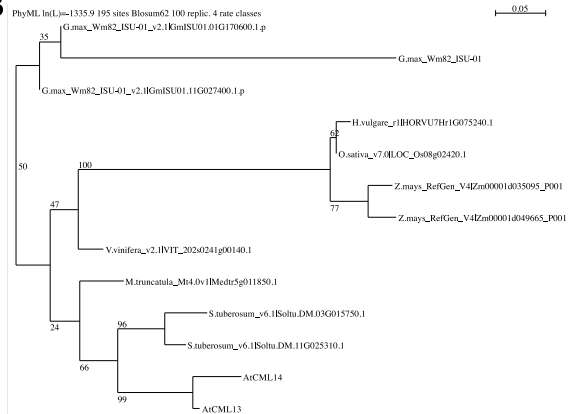

Supplemental Figure S1. Comparison of Arabidopsis CML13 and CML14 with predicted orthologs. (A) Protein alignment of CML13 and CML14 with orthologs from various plant species. Amino acid residues were shaded based on their percent identity, dark grey if identical, and progressively lighter grey until white as unconserved. ClustalΩ was used for alignment (Sievers and Higgins, 2014) and images were generated using Jalview Version 2.11.2.6. (B) Phylogenetic tree showing relatedness among the proteins compared in panel A. SeaView (v 5.0, Gouy et al., 2021) was used to generate the tree using neighbour-joining with bootstrapping analysis (1000 reiterations).

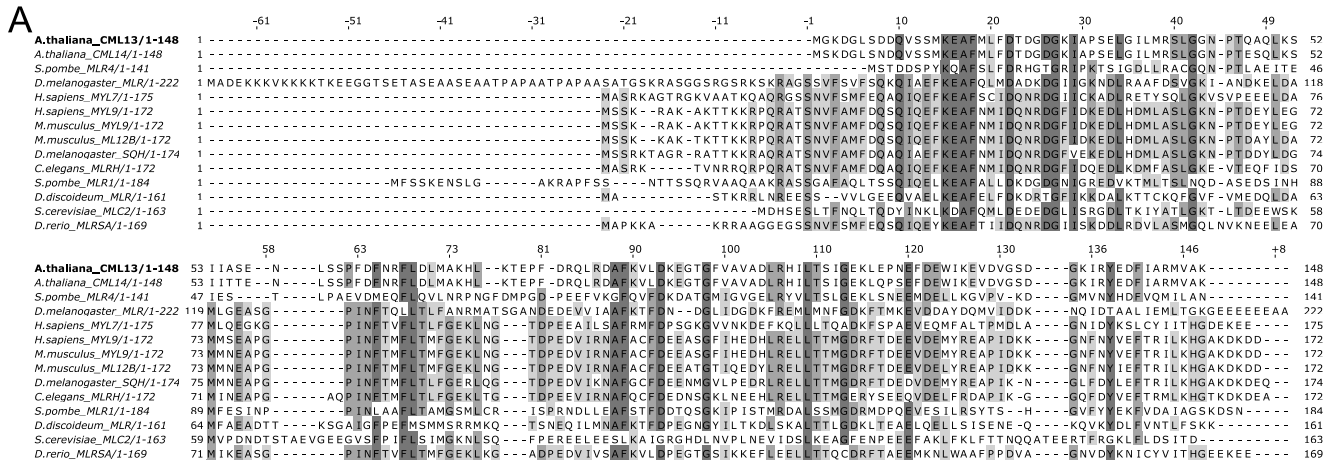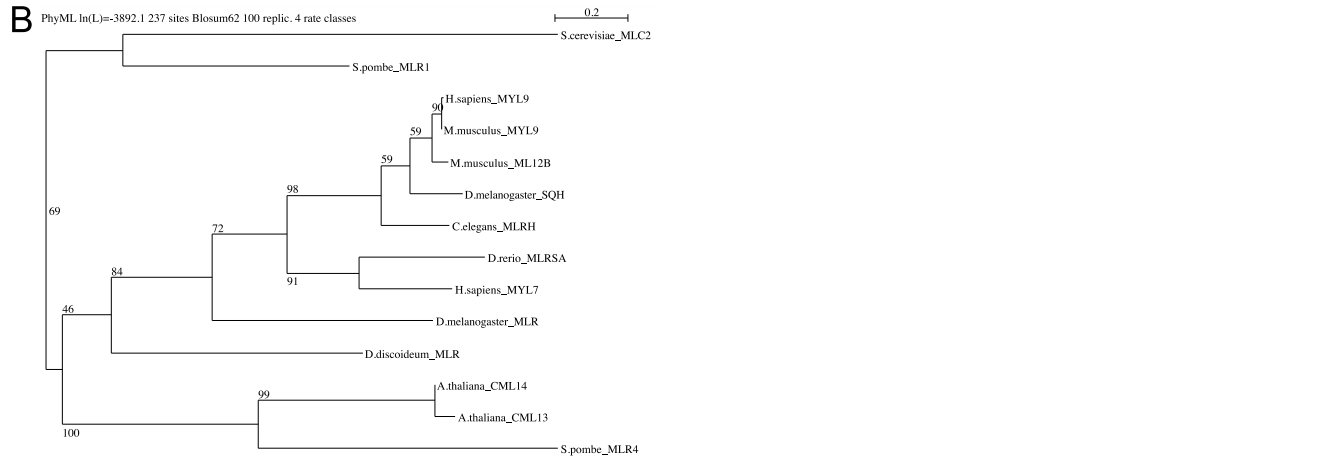

Supplemental Fig S2. Comparison of Arabidopsis CML13/14 with regulatory myosin light-chains (RLCs) from various species of eukaryotes. (A) Protein alignment of CML13 and CML14 with myosin RLCs from multiple species. Amino acid residues were shaded based on their percent identity, dark grey if identical, and progressively lighter grey until white as unconserved. ClustalΩ was used for alignment (Sievers and Higgins, 2014) and images were generated using Jalview Version 2.11.2.6. (B) Phylogenetic tree showing relatedness among myosin RLCs compared in panel A. SeaView (v 5.0, Gouy et al., 2021) was used to generate the tree using neighbour-joining with bootstrapping analysis (1000 reiterations).

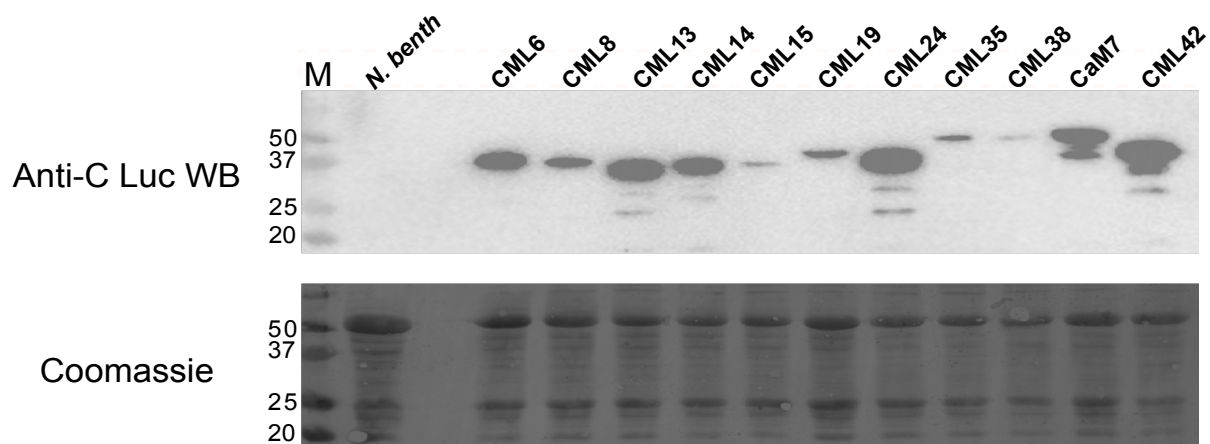

Supplemental Fig S3. Immunoblot showing expression of C-Luc-CaM/CML fusion proteins in *N. benthamiana*. Leaves of *N. benthamiana* were infiltrated with *Agrobacteria* expressing C-Luc (bait) vectors and N=Luc (prey) vectors as described in Materials and Methods. Immunoblots (upper panel) using anti-C-terminal luciferase antisera, or Coomassie-stained gels showing equal lane loading, following SDS-PAGE of samples of total, clarified protein extracts (~25ug) from leaves used in the split-luciferase assays.

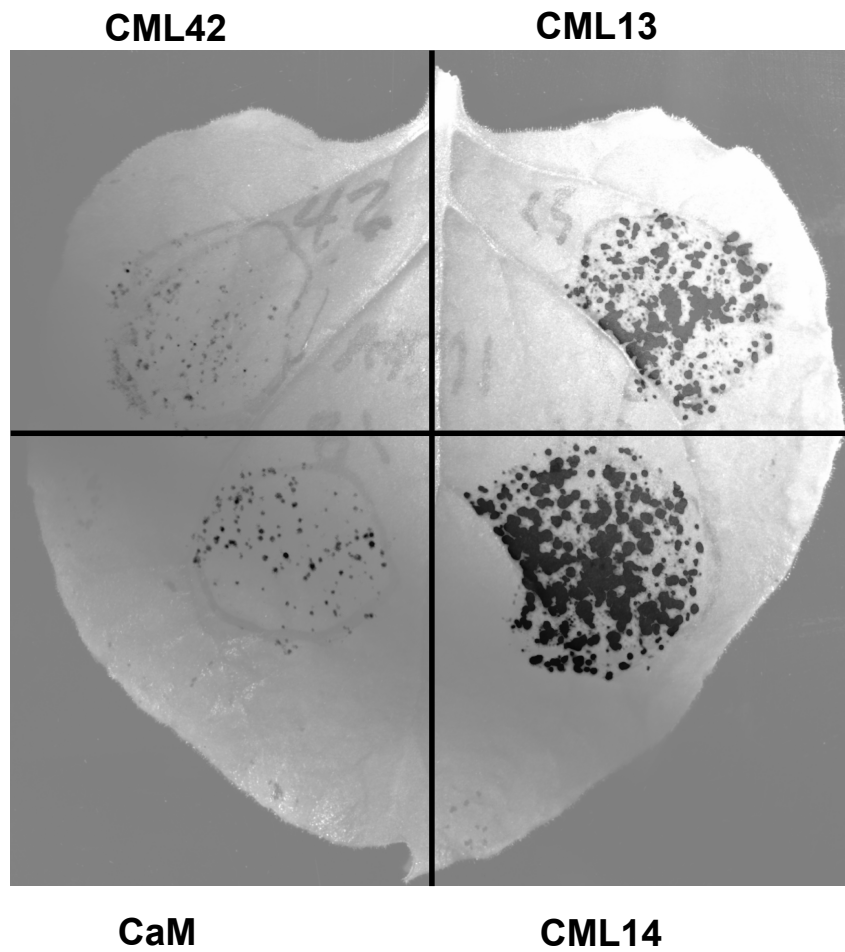

Supplemental Figure S4. Whole-leaf image of split-luciferase protein-protein interaction bioluminescent assays using transiently transformed *N. benthamiana*. A representative image is shown for interaction analysis of CML13, CML14, CaM, and CML42 (negative control) as baits (as C-Luc fusion proteins) with the neck region of ATM1 (as N-luc fusion) prey protein.

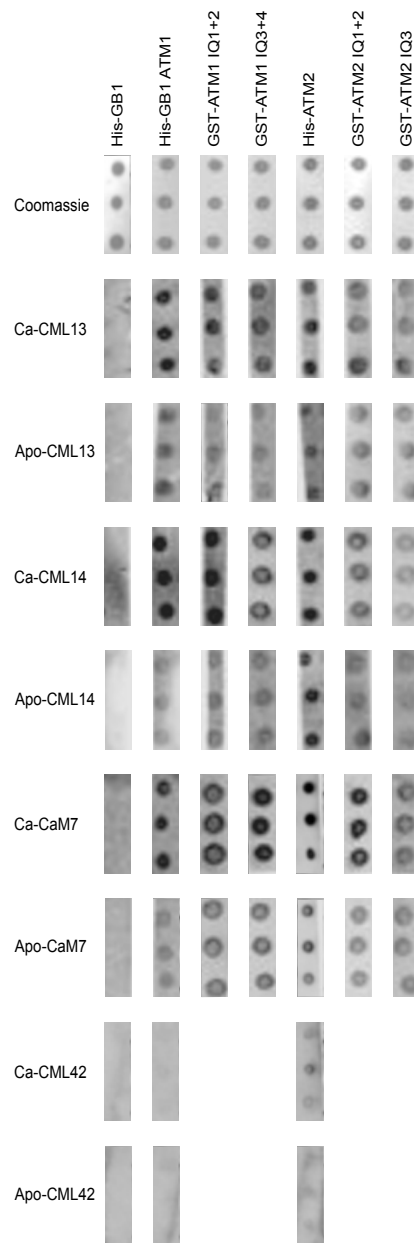

**Supplementary Fig. S5.** *In vitro* protein-interaction overlay assays of CaM, CML13, CML14, and CML42 with IQ domains of ATM1 and ATM2. Triplicate samples (200 ng) of pure, recombinant proteins ATM1 or ATM2 full-neck region (ATM1, ATM2), paired IQ domains (ATM1-IQ1+2, -IQ3+4, ATM2-IQ1+2), or the isolated IQ domain of ATM2 (ATM2-IQ3), were spotted onto nitrocellulose, blocked with 5% casein in TBST, and incubated with 200 nM of CaM, CML13, CML14, or CML42, as indicated, each of which was covalently labeled with the infra-red dye, 680RD-NHS as described in Materials and Methods. Recombinant GB1 was tested as a negative control. Protein-protein interaction was assayed in the presence of 2 mM  $\text{CaCl}_2$  (Ca) or 5 mM EGTA (Apo) and detected using the LI-COR Odyssey-XF infra-red imager. Representative Coomassie-stained blots are presented along the top row. Data are representative of a minimum of three independent experiments. See Supplementary Table 2 for a description of the primary sequence from the neck regions of ATM1 and ATM2 that were tested for binding.

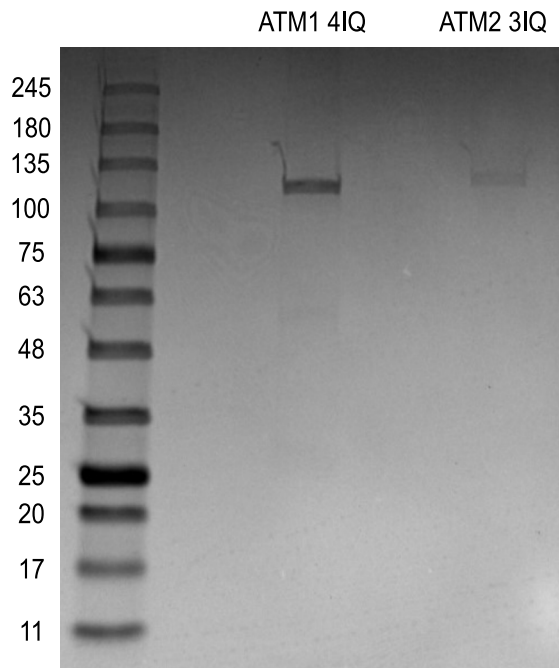

**Supplementary Fig. S6.** SDS-PAGE of purified recombinant myosins. ATM1-4IQ and ATM2-3IQ were purified in High Five cells without co-expression of CaM and without addition of calmodulin during the purification process. The purified proteins were analyzed by SDS-PAGE using a 4-20% polyacrylamide gradient and stained with Coomassie brilliant blue. The positions of the molecular mass markers are indicated on the left (kDa).

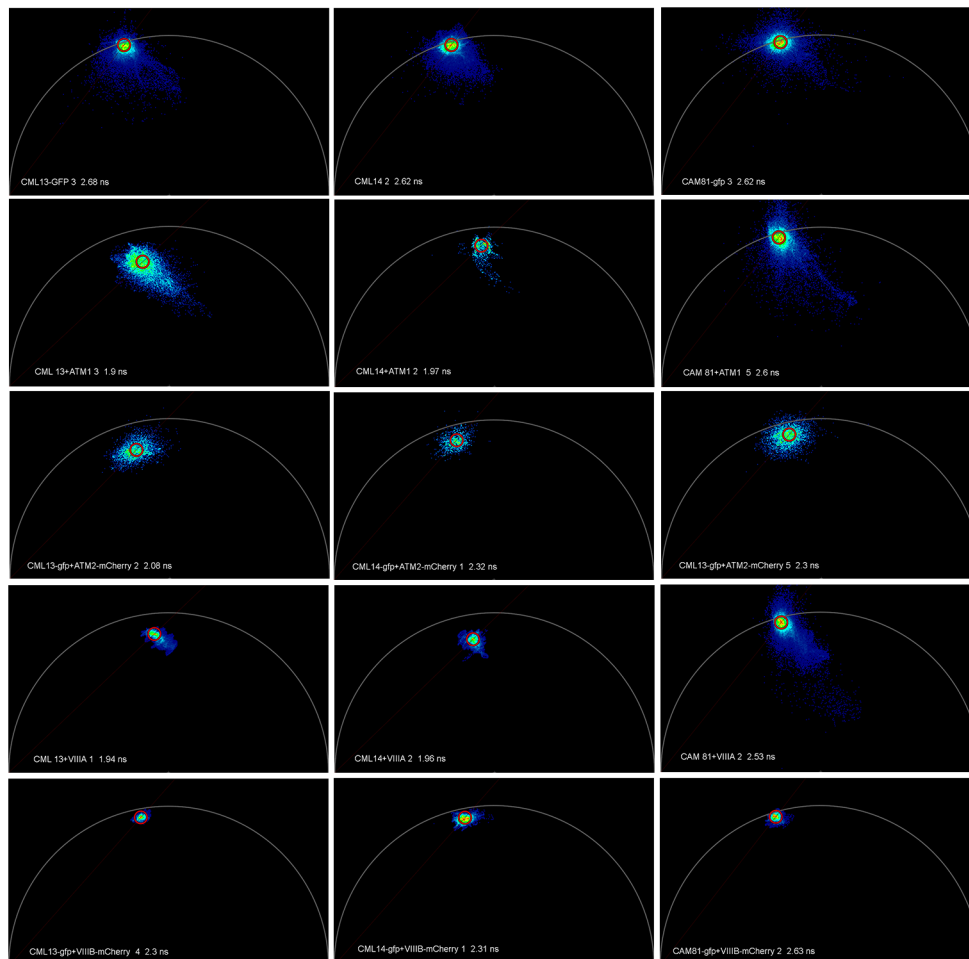

**Supplementary Figure S7.** Representative phasor plots are shown corresponding to the FRET-FLIM analysis presented in Figure 3. This figure highlights the distinctions in the fluorescence decay of GFP (donor) fused to CMLs or CaM alone and when coexisting with RFP (acceptor) fused to the different class VIII myosin members. Each image represents one cell. Quantitative analysis of the whole experiment is shown in figure 3. CaM81 refers to the conserved CaM isoform (see Materials and Methods).
